# Supplementary material
Source: Springer Nature journal article supplement (https://www.springermedizin.de/resource/supplementary/12943_2009_697_MOESM6_ESM.pdf/9554602)

LN-AI, 24h

DU145, 72h

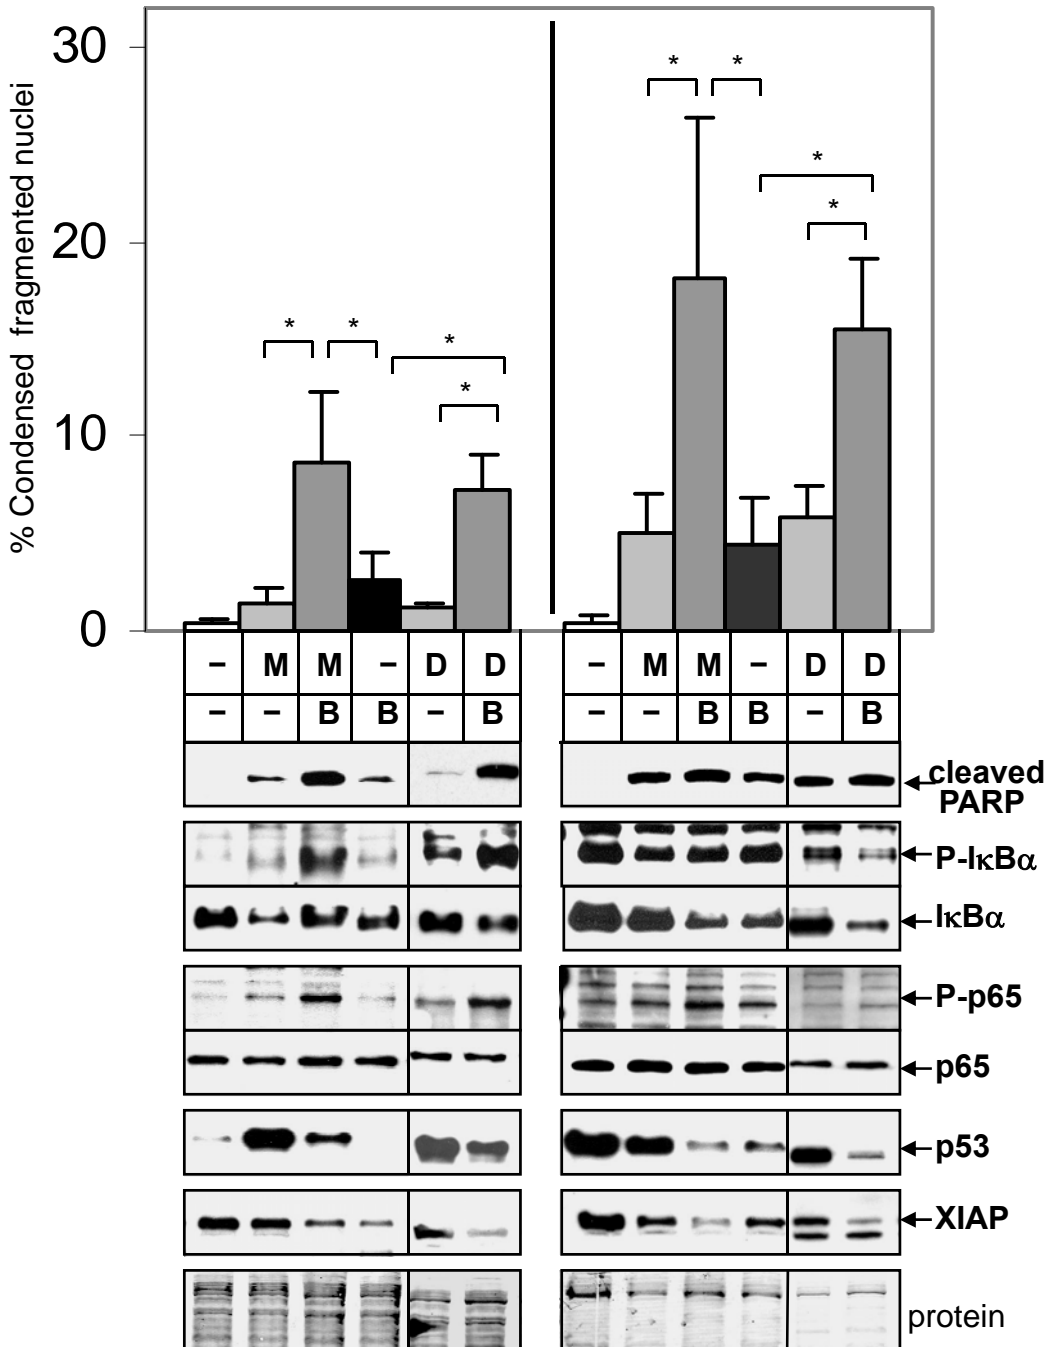

Supplement: MOESM6 [file 9554602]
